# Supplementary material for: MiR-148a Functions as a Tumor Suppressor by Targeting CCK-BR via Inactivating STAT3 and Akt in Human Gastric Cancer
Source: PLoS One. 2016 Aug 12;11(8):e0158961. doi: 10.1371/journal.pone.0158961 (PMC4982598; doi:10.1371/journal.pone.0158961)
Supplement: S2 Table — (XLSX) [file pone.0158961.s004.xlsx]

## Sheet: 工作表1
S2 Table Tumor weight (g)
NCI-N87/miR-148a	NCI-N87/nc	NCI-N87
1.56	2.89	1.71
0.73	3.1	1.62
0.55	1.53	3.84
0.51	1.03	2.58
1.15	1.01	1.47
1.37	4.04	3.24
